# Supplementary material for: Circular Concatemers of Ultra-Short DNA Segments Produce Regulatory RNAs
Source: PubMed Central journal article supplement — Cell. 2017 Mar 9;168(6):990–999.e7. doi: 10.1016/j.cell.2017.02.020 (PMC5346157; doi:10.1016/j.cell.2017.02.020), 2017-03-09
Supplement: mmc1.pdf [file mmc1.pdf]

**Cell, Volume 168**

**Supplemental Information**

**Circular Concatemers of Ultra-Short**

**DNA Segments Produce Regulatory RNAs**

**Sarah E. Allen, Iris Hug, Sylwia Pabian, Iwona Rzeszutek, Cristina Hoehener, and Mariusz Nowacki**

| REAGENT or RESOURCE                                                 | SOURCE                                                      | IDENTIFIER |
|---------------------------------------------------------------------|-------------------------------------------------------------|------------|
| crypIESa sequence 5'<br>TATAGGCATATAGAATAAGCAAATCTATA 3'            | This work,<br>synthesised by<br>Microsynth<br>(Switzerland) | N/A        |
| crypIESb sequence: 5'<br>TATAGGTTTGCTTCTATGATGAAACTATA 3'           | This work,<br>synthesised by<br>Microsynth<br>(Switzerland) | N/A        |
| crypIESc sequence: 5'<br>TATAGGCTTTGAATAAGATTATCACTATA 3'           | This work,<br>synthesised by<br>Microsynth<br>(Switzerland) | N/A        |
| crypIESa F primer to check excision 5'<br>GCTGTGATGAAGTTTGAGATGC 3' | This work,<br>synthesised by<br>Microsynth<br>(Switzerland) | N/A        |
| crypIESa R primer to check excision 5'<br>TAAGGTTGTGGGGCAGCTAT 3'   | This work,<br>synthesised by<br>Microsynth<br>(Switzerland) | N/A        |
| crypIESb F primer to check excision 5'<br>AAAGGTCATGCTAATGCTGT 3'   | This work,<br>synthesised by<br>Microsynth<br>(Switzerland) | N/A        |
| crypIESb R primer to check excision 5'<br>ATCTCCACTACAGGATGCAA 3'   | This work,<br>synthesised by<br>Microsynth<br>(Switzerland) | N/A        |
| crypIESc F primer to check excision 5'<br>TTGTTTTGGCCAATTCATCC 3'   | This work,<br>synthesised by                                | N/A        |

|                                                                                                            |                                                             |     |
|------------------------------------------------------------------------------------------------------------|-------------------------------------------------------------|-----|
|                                                                                                            | Microsynth<br>(Switzerland)                                 |     |
| cryptIESc R primer to check excision 5'<br>ATTAATTCATGCAGTGCGTC 3'                                         | This work,<br>synthesised by<br>Microsynth<br>(Switzerland) | N/A |
| <i>Dcl5</i> sensitive IES to check silencing efficiency:<br>IESPGM.PTET51.1.137.127377                     | This work,<br>synthesised by<br>Microsynth<br>(Switzerland) | N/A |
| F primer to check excision of<br>IESPGM.PTET51.1.137.127377 5'<br>GCCATAACAATTATTACCTCCATAACAATCTTACATG 3' | This work,<br>synthesised by<br>Microsynth<br>(Switzerland) | N/A |
| R primer to check excision of<br>IESPGM.PTET51.1.137.127377 5'<br>CTCATTTAATCCATCATCCTATTCTTCCTCCTG 3'     | This work,<br>synthesised by<br>Microsynth<br>(Switzerland) | N/A |
| <i>Ligase IVa</i> F primer 5' GTCATTCAATTATATTTGAAGTT<br>AAA GCT GC 3'                                     | This work,<br>synthesised by<br>Microsynth<br>(Switzerland) | N/A |
| <i>Ligase IVa</i> R primer 5'<br>GGGGTACCCAGTTTCATTTTTTCATATT ATC A 3'                                     | This work,<br>synthesised by<br>Microsynth<br>(Switzerland) | N/A |
| <i>Ligase IVb</i> F primer 5' ATAATCCAGCTCATTCAATTATATTTG<br>AAGTTAAAGC 3'                                 | This work,<br>synthesised by<br>Microsynth<br>(Switzerland) | N/A |

|                                                                  |                                                             |     |
|------------------------------------------------------------------|-------------------------------------------------------------|-----|
| Ligase IVb R primer 5'<br>GGGGTACCAGGTTTCATTAATTTTCATA TTATCG 3' | This work,<br>synthesised by<br>Microsynth<br>(Switzerland) | N/A |
| Primer on IES A Forward 5' GGATTCTCTGAACATCAAGTG<br>3'           | This work,<br>synthesised by<br>Microsynth<br>(Switzerland) | N/A |
| Primer on IES A Reverse 5' CCATCCCATTTTGTATGTCAAG<br>3'          | This work,<br>synthesised by<br>Microsynth<br>(Switzerland) | N/A |
| Primer on IES B Forward 5' GTTACTCCGATTGCAACCAC 3'               | This work,<br>synthesised by<br>Microsynth<br>(Switzerland) | N/A |
| Primer on IES B Reverse 5'<br>CACTGAAGTGAGAGAGTCTACTG 3'         | This work,<br>synthesised by<br>Microsynth<br>(Switzerland) | N/A |
| Primer on IES C Forward 5'<br>GGTACTCAATAAGACCTTAATTC 3'         | This work,<br>synthesised by<br>Microsynth<br>(Switzerland) | N/A |
| Primer on IES C Reverse 5'<br>CTCCGAATGATATAAATTATAGG 3'         | This work,<br>synthesised by<br>Microsynth<br>(Switzerland) | N/A |
| Primer on IES D Forward 5' AATACAATGACGGTAGTGCTG<br>3'           | This work,<br>synthesised by                                | N/A |

|                                                                                                                                                                                                                                                                                                                                                                                                                                                                                                                                                                                                                                                                                                                                                                                                                                                                                                                                                                                                                                                                                                                                       |                                                             |     |
|---------------------------------------------------------------------------------------------------------------------------------------------------------------------------------------------------------------------------------------------------------------------------------------------------------------------------------------------------------------------------------------------------------------------------------------------------------------------------------------------------------------------------------------------------------------------------------------------------------------------------------------------------------------------------------------------------------------------------------------------------------------------------------------------------------------------------------------------------------------------------------------------------------------------------------------------------------------------------------------------------------------------------------------------------------------------------------------------------------------------------------------|-------------------------------------------------------------|-----|
|                                                                                                                                                                                                                                                                                                                                                                                                                                                                                                                                                                                                                                                                                                                                                                                                                                                                                                                                                                                                                                                                                                                                       | Microsynth<br>(Switzerland)                                 |     |
| Primer on IES D Reverse 5' CGACTATCACGAGATGACTG 3'                                                                                                                                                                                                                                                                                                                                                                                                                                                                                                                                                                                                                                                                                                                                                                                                                                                                                                                                                                                                                                                                                    | This work,<br>synthesised by<br>Microsynth<br>(Switzerland) | N/A |
| Primer on IES E Forward 5'<br>GTTCTCCATATTTATTAGTTCAAGAG 3'                                                                                                                                                                                                                                                                                                                                                                                                                                                                                                                                                                                                                                                                                                                                                                                                                                                                                                                                                                                                                                                                           | This work,<br>synthesised by<br>Microsynth<br>(Switzerland) | N/A |
| Primer on IES E Reverse 5'<br>TTTAATACTAGATAATTGCTAGCTG 3'                                                                                                                                                                                                                                                                                                                                                                                                                                                                                                                                                                                                                                                                                                                                                                                                                                                                                                                                                                                                                                                                            | This work,<br>synthesised by<br>Microsynth<br>(Switzerland) | N/A |
| LigIVa silencing construct (circular)<br>AACCTGGCTTATCGAAATTAATACGACTCACTATAGGG<br>AGACCGGCAGATCTGATATCATCGATGAATTCGAGCTC<br>CACCGCGGTGGCGGCCGCTCTAGAAGTAGTGGATCCAC<br>CGTTCCATGGCTAGCCACGTGACGCGTGGATCCCCCG<br>GGCTGCAGAAATCACAAAGTCTAATACTTTTCCAAGT<br>ATTACACTCTTAGATTTCCACGATGTTACAAGACAAGAA<br>TGGATAAAGACTGGTATGAAATGATGACCACGCAAGAT<br>TTATCAAGTATGATCAATGACTCATAATACACTAAGAAT<br>CTCAAAAAAAAAAGAACGATAAAGAAGGCAATGATAAATA<br>AACAGACGATGAGGTTGAAAATGAGGATAGACCTATTA<br>GATAGGCTAAATAGAGAAAATAACCCTTAAAGAAAGGT<br>GGAGCTCATTCTAAATAGATTACCATAATGACTGAATTT<br>CAAGGATTAGATCCAAGAAACATCACAAAAGAATCCAA<br>CCTATTTGTAGGATGCGAATTTTTTATTGTGAATTTAG<br>AAGAAGATTATAATAAATAATATTTAGAATCTATAGTTC<br>TAGCCCAAGGAGGAAGTTGTATATAAAATTACATTGTA<br>GAAAGTGTCACCTCATGTAGTGGCTTCGATTATAGATTT<br>TAGAGTGAATTCATTATTGAGAAGTTCCTACTACTAT<br>CATCAGACCATAATGGATAATTGAATGCATTAGAAGAT<br>CATAATTAGTTAATATTGCACCTAGATTTATTTTGTGTTG<br>CCCCTAGCCATCATGAATGAAGTCAATAAATTCTATG<br>ATAGGTTTGGTGATTCCTATTTTGAATTGATTGACGAT<br>TTGGCTCTCAAAGATATCTGTGATAATATGAAAATTAAT<br>GAAACTGGGTACCCAATTCGCCCTATAGTGAGTCGTAT<br>TACGCGCGCTCACTGGCCGTCGTTTTACAACGTCGTGA | This work,<br>generated using<br>primers described<br>above | N/A |

CTGGGAAAACCCTGGCGTTACCCAACCTTAATCGCCTTG  
CAGCACATCCCCCTTCGCCAGCTGGCGTAATAGCGAA  
GAGGCCCGCACCGATCGCCCTTCCCAACAGTTGCGCAG  
CCTGAATGGCGAATGGGACGCGCCCTGTAGCGGCGCA  
TTAAGCGCGGCGGGTGTGGTGGTTACGCGCAGCGTGA  
CCGCTACACTTGCCAGCGCCCTAGCGCCCGCTCCTTTC  
GCTTTCCTCCCTTCCTTCTCGCCACGTTGCGCCGGCTT  
CCCCGTCAAGCTCTAAATCGGGGGCTCCCTTAGGGTT  
CCGATTTAGTGCTTACGGCACCTCGACCCCAAAAAC  
TTGATTAGGGTGATGGTTCACGTAGTGGGCCATCGCCC  
TGATAGACGGTTTTTCGCCCTTTGACGTTGGAGTCCAC  
GTTCTTTAATAGTGGACTCTTGTTCCAACTGGAACAA  
CACTCAACCCTATCTCGGTCTATTCTTTTGATTTATAAG  
GGATTTTGCCGATTTTCGGCCTATTGGTTAAAAAATGAG  
CTGATTTAACAAAAATTTAACGCGAATTTAACAAAATA  
TTAACGCTTACAATTTAGGTGGCACTTTTCGGGGAAAT  
GTGCGCGGAACCCCTATTTGTTTATTTTTCTAAATACAT  
TCAAATATGTATCCGCTCATGAGACAATAACCCTGATAA  
ATGCTTCAATAATATTGAAAAAGGAAGAGTATGAGTAT  
TCAACATTTCCGTGTCGCCCTTATTCCCTTTTTTGCGGC  
ATTTTGCCTTCTGTTTTTGTCTACCCAGAAACGCTGG  
TGAAAGTAAAAGATGCTGAAGATCAGTTGGGTGCACGA  
GTGGGTACATCGAACTGGATCTCACAGCGGTAAGAT  
CCTTGAGAGTTTTCGCCCCGAAGAACGTTTTCCAATGA  
TGAGCACTTTTAAAGTTCTGCTATGTGGCGCGGTATTA  
TCCCGTATTGACGCCGGCAAGAGCAACTCGGTGCGCCG  
CATACTATTCTCAGAAATGACTTGGTTGAGTACTCAC  
CAGTCACAGAAAAGCATCTTACGGATGGCATGACAGTA  
AGAGAATTATGCAGTGCTGCCATAACCATGAGTGATAA  
CACTGCGGCCAACTTACTTCTGACAACGATCGGAGGAC  
CGAAGGAGCTAACCGCTTTTTTGCACAACATGGGGGAT  
CATGTAACCTCGCCTTGATCGTTGGGAACCGGAGCTGAA  
TGAAGCCATACCAAACGACGAGCGTGACACCACGATGC  
CTGTAGCAATGGCAACAACGTTGCGCAAATTAAT  
GGCGAACTACTTACTTAGCTTCCCGGCAACAATTAAT  
AGACTGGATGGAGGCGGATAAAGTTGCAGGACCACTTC  
TGCGCTCGGCCCTCCGGCTGGCTGGTTTATTGCTGAT  
AAATCTGGAGCCGGTGAGCGTGGGTCTCGCGGTATCAT  
TGCAGCACTGGGGCCAGATGGTAAGCCCTCCCGTATCG  
TAGTTATCTACACGACGGGGAGTCAGGCAACTATGGAT  
GAACGAAATAGACAGATCGCTGAGATAGGTGCCTCACT  
GATTAAGCATTGGTAACTGTCAGACCAAGTTTACTCAT  
ATATACTTTAGATTGATTTAAAACCTTCATTTTTAATTTA  
AAAGGATCTAGGTGAAGATCCTTTTTGATAATCTCATG  
ACCAAATCCCTAACGTGAGTTTTTCGTTCCACTGAGC  
GTCAGACCCCGTAGAAAAGATCAAAGGATCTTCTTGAG  
ATCCTTTTTTTCTGCGCGTAATCTGCTGCTTGCAAACAA  
AAAAACCACCGCTACCAGCGGTGGTTTGTGGCCGGAT

|                                                                                                                                                                                                                                                                                                                                                                                                                                                                                                                                                                                                                                                                                                                                                                                                                                                                                                                                                                                                                                                                                                                                                                                                                                                                                          |                                                                          |            |
|------------------------------------------------------------------------------------------------------------------------------------------------------------------------------------------------------------------------------------------------------------------------------------------------------------------------------------------------------------------------------------------------------------------------------------------------------------------------------------------------------------------------------------------------------------------------------------------------------------------------------------------------------------------------------------------------------------------------------------------------------------------------------------------------------------------------------------------------------------------------------------------------------------------------------------------------------------------------------------------------------------------------------------------------------------------------------------------------------------------------------------------------------------------------------------------------------------------------------------------------------------------------------------------|--------------------------------------------------------------------------|------------|
| <p>CAAGAGCTACCAACTCTTTTTCCGAAGGTAAGTGGCTT<br/> CAGCAGAGCGCAGATACCAAATACTGTCCTTCTAGTGT<br/> AGCCGTAGTTAGGCCACCACTTCAAGAACTCTGTAGCA<br/> CCGCCTACATACCTCGCTCTGCTAATCCTGTTACCACT<br/> GGCTGCTGCCAGTGGCGATAAGTCGTGTCTTACCGGGT<br/> TGGACTCAAGACGATAGTTACCGGATAAGGCGCAGCGG<br/> TCGGGCTGAACGGGGGGTTCGTGCACACAGCCCAGCT<br/> TGGAGCGAACGACCTACACCGAACTGAGATACCTACAG<br/> CGTGAGCTATGAGAAAGCGCCACGCTTCCCAGAGGGAG<br/> AAAGGCGGACAGGTATCCGGTAAGCGGCAGGGTCGGA<br/> ACAGGAGAGCGCACGAGGGAGCTTCCAGGGGGAAACG<br/> CCTGGTATCTTTATAGTCCTGTCGGGTTTCGCCACCTC<br/> TGACTTGAGCGTCGATTTTTGTGATGCTCGTCAGGGGG<br/> GCGGAGCCTATGGAAAACGCCAGCAACGCGGCCTTTT<br/> TACGGTTCCTGGCCTTTTGCTGGCCTTTTGCTCACATG<br/> TTCTTTCTGCGTTATCCCCTGATTCTGTGGATAACCG<br/> TATTACCGCCTTTGAGTGAGCTGATACCGCTCGCCGCA<br/> GCCGAACGACCGAGCGCAGCGAGTCAGTGAGCGAGGA<br/> AGC</p>                                                                                                                                                                                                                                                                                                                                                                                                                                                             |                                                                          |            |
| <p>LigaseIvB silencing construct (circular)</p> <p>AACCTGGCTTATCGAAATTAATACGACTCACTATAGGG<br/> AGACCGGCAGATCTGATATCATCGATGAATTCGAGCTC<br/> CACCGCGGTGGCGGCCGCTCTAGAAGTGGATCCAC<br/> CGGTTCCATGGCTAGCCACGTGACGCGTGGATCCCCCG<br/> GGCTGCAGAAATCACAAAGTCGAATACTTTCCCAACCG<br/> ATTACACTCTTAGATTTCCAAGATGTTACAAGACTAGAA<br/> TGGACAAAGATTGGTATGAAATGATGACCACACAAGAT<br/> TTATCAAGTATGATCAATGACTCATAATACACAAAGAAT<br/> CTCAAAAAGAAGAATGATAAAGAAGGAAACGATAAATA<br/> AACAGATGATGAGGTTGAAAATGAAGACAGACCTATGA<br/> GGTAGGCTAAAGAAAGAAAATAACCCTTAAGAAAAGGT<br/> GGAGCCCATTCTAAATAGATTACCATAATGACTGAATA<br/> TTAAGGGTTAGATCCAAGAAACATCACTAAAGAATCCA<br/> ACCTGTTTGTAGGATGCGAATTTTATATTGTTAACTTA<br/> GAAGAAGATTATAATAAATAATTTTTGAATCTATAATT<br/> CTAGCCTAAGGAGGAACTTGCATATAAAATTATATCGT<br/> AGAAAGTGCTACTCATGTAGTGGCTTCAATTATCGACT<br/> TTAGAGTGAATTCGATCATTGAGAAGTTTCCAACCTACC<br/> ATAATTAGACCTCAATGGGTTATTGAATGCATTAGAAG<br/> GTCGCAATTAGTTAATATTGCACCAAGATTTATTTTATT<br/> TGCCCCTTTGGCTATCATGAATGAAGTGAATAAATTCT<br/> ACGATAAATTTGGTGATTCCTATTTTCGAATTGATTGAT<br/> GAATTTGCTCTCAAAGATATATGCGATAATATGAAAATT<br/> AATGAACCTGGTACCCAATTCGCCCTATAGTGAGTCGT<br/> ATTACGCGCGCTCACTGGCCGTCGTTTTACAACGTCGT<br/> GACTGGGAAAACCCTGGCGTTACCCAACCTAATCGCCT<br/> TGCAGCACATCCCCCTTTCGCCAGCTGGCGTAATAGCG</p> | <p>This work,<br/> generated using<br/> primers described<br/> above</p> | <p>N/A</p> |

AAGAGGCCCGCACCGATCGCCCTTCCCAACAGTTGCGC  
AGCCTGAATGGCGAATGGGACGCGCCCTGTAGCGGCG  
CATTAAAGCGCGGGGTGTGGTGGTTACGCGCAGCGT  
GACCGCTACACTTGCCAGCGCCCTAGCGCCCGCTCCTT  
TCGCTTTCTTCCCTTCTTTCTCGCCACGTTGCGCGGCT  
TTCCCCGTCAAGCTCTAAATCGGGGGCTCCCTTTAGGG  
TTCCGATTTAGTGCTTTACGGCACCTCGACCCAAAAA  
ACTTGATTAGGGTGTATGGTTCACGTAGTGGGCCATCGC  
CCTGATAGACGGTTTTTCGCCCTTTGACGTTGGAGTCC  
ACGTTCTTTAATAGTGGACTCTTGTTCCAAACTGGAAC  
AACACTCAACCCTATCTCGGTCTATTCTTTTGATTTATA  
AGGGATTTTGCCGATTTGCGCCTATTGGTTAAAAAATG  
AGCTGATTTAACAAAAATTTAACGCGAATTTAACAAAA  
TATTAACGCTTACAATTTAGGTGGCACTTTTCGGGGAA  
ATGTGCGCGGAACCCCTATTTGTTTATTTTCTAAATAC  
ATTCAAATATGTATCCGCTCATGAGACAATAACCCTGAT  
AAATGCTTCAATAATATTGAAAAAGGAAGAGTATGAGT  
ATTCAACATTTCCGTGTCGCCCTTATTCCCTTTTTTGCG  
GCATTTTGCTTCTGTTTTTGCTCACCCAGAAACGCT  
GGTGAAAGTAAAAGATGCTGAAGATCAGTTGGGTGCAC  
GAGTGGGTACATCGAACTGGATCTCAACAGCGGTAAG  
ATCCTTGAGAGTTTTCGCCCCGAAGAACGTTTTCCAAT  
GATGAGCACTTTTAAAGTTCTGCTATGTGGCGCGGTAT  
TATCCCGTATTGACGCCGGCAAGAGCAACTCGGTGCG  
CGCATACACTATTCTCAGAATGACTTGGTTGAGTACTC  
ACCAGTCACAGAAAAGCATCTTACGGATGGCATGACAG  
TAAGAGAATTATGCAGTGCTGCCATAACCATGAGTGAT  
AACACTGCGGCCAACTTACTTCTGACAACGATCGGAGG  
ACCGAAGGAGCTAACCGCTTTTTTGACAACATGGGGG  
ATCATGTAACCTCGCCTTGATCGTTGGGAACCGGAGCTG  
AATGAAGCCATACCAAACGACGAGCGTGACACCACGAT  
GCCTGTAGCAATGGCAACAACGTTGCGCAAATTTAA  
CTGGCGAACTACTTACTCTAGCTTCCCGGCAACAATTA  
ATAGACTGGATGGAGGCGGATAAAGTTGCAGGACCACT  
TCTGCGCTCGGCCCTTCCGGCTGGCTGGTTTATTGCTG  
ATAAATCTGGAGCCGGTGAGCGTGGGTCTCGCGGTATC  
ATTGCAGCACTGGGGCCAGATGGTAAGCCCTCCCGTAT  
CGTAGTTATCTACACGACGGGGAGTCAGGCAACTATGG  
ATGAACGAAATAGACAGATCGCTGAGATAGGTGCCTCA  
CTGATTAAGCATTGGTAACTGTCAGACCAAGTTTACTC  
ATATATACTTTAGATTGATTTAAACTTCATTTTTAATT  
TAAAAGGATCTAGGTGAAGATCCTTTTTGATAATCTCA  
TGACCAAATCCCTAACGTGAGTTTTCGTTCCACTGA  
GCGTCAGACCCCGTAGAAAAGATCAAAGGATCTTCTTG  
AGATCCTTTTTTTCTGCGCGTAATCTGCTGCTTGCAA  
CAAAAAACCACCGCTACCAGCGGTGGTTTGTGTTGCCG  
GATCAAGAGCTACCAACTCTTTTTCCGAAGGTAAGTGG  
CTTCAGCAGAGCGCAGATACCAATACTGTCTTCTAG

|                                                                                                                                                                                                                                                                                                                                                                                                                                                                                                                                                                                                                                                                                                                                          |  |  |
|------------------------------------------------------------------------------------------------------------------------------------------------------------------------------------------------------------------------------------------------------------------------------------------------------------------------------------------------------------------------------------------------------------------------------------------------------------------------------------------------------------------------------------------------------------------------------------------------------------------------------------------------------------------------------------------------------------------------------------------|--|--|
| <p>TGTAGCCGTAGTTAGGCCACCACTTCAAGAACTCTGTA<br/> GCACCGCCTACATACTCGCTCTGCTAATCCTGTTACCA<br/> GTGGCTGCTGCCAGTGGCGATAAGTCGTGTCTTACCGG<br/> GTTGGACTCAAGACGATAGTTACCGGATAAGGCGCAGC<br/> GGTCGGGCTGAACGGGGGGTTCGTGCACACAGCCCAG<br/> CTTGGAGCGAACGACCTACACCGAACTGAGATACCTAC<br/> AGCGTGAGCTATGAGAAAGCGCCACGCTTCCCGAAGGG<br/> AGAAAGGCGGACAGGTATCCGGTAAGCGGCAGGGTCG<br/> GAACAGGAGAGCGCACGAGGGAGCTTCCAGGGGGAAA<br/> CGCCTGGTATCTTTATAGTCCTGTCGGGTTTCGCCACC<br/> TCTGACTTGAGCGTCGATTTTTGTGATGCTCGTCAGGG<br/> GGGCGGAGCCTATGGAAAAACGCCAGCAACGCGGCCT<br/> TTTTACGGTTCCTGGCCTTTTGCTGGCCTTTTGCTCAC<br/> ATGTTCTTTCCTGCGTTATCCCCTGATTCTGTGGATAA<br/> CCGTATTACCGCCTTTGAGTGAGCTGATACCGCTCGCC<br/> GCAGCCGAACGACCGAGCGCAGCGAGTCAGTGAGCGA<br/> GGAAGC</p> |  |  |
|------------------------------------------------------------------------------------------------------------------------------------------------------------------------------------------------------------------------------------------------------------------------------------------------------------------------------------------------------------------------------------------------------------------------------------------------------------------------------------------------------------------------------------------------------------------------------------------------------------------------------------------------------------------------------------------------------------------------------------------|--|--|

**Supplementary table S2.**

| Identifier<br>in text and<br>figures | Identity on ParameciumDB<br><a href="http://paramecium.cgm.cnrs-gif.fr">http://paramecium.cgm.cnrs-gif.fr</a> |
|--------------------------------------|---------------------------------------------------------------------------------------------------------------|
| A                                    | IESPGM.PTET51.1.86.43013                                                                                      |
| B                                    | IESPGM.PTET51.1.115.110447                                                                                    |
| C                                    | IESPGM.PTET51.1.46.377227                                                                                     |
| D                                    | IESPGM.PTET51.1.118.81158                                                                                     |
| E                                    | IESPGM.PTET51.1.412.3291                                                                                      |
| 1                                    | IESPGM.PTET51.1.128.196488                                                                                    |
| 2                                    | IESPGM.PTET51.1.99.289480                                                                                     |
| 3                                    | IESPGM.PTET51.1.41.81600                                                                                      |
| 4                                    | IESPGM.PTET51.1.90.61866                                                                                      |
| 5                                    | IESPGM.PTET51.1.55.237085                                                                                     |
| 6                                    | IESPGM.PTET51.1.25.73295                                                                                      |
| 7                                    | IESPGM.PTET51.1.44.313165                                                                                     |
| 8                                    | IESPGM.PTET51.1.42.184821                                                                                     |
| 9                                    | IESPGM.PTET51.1.178.17054                                                                                     |
| 10                                   | IESPGM.PTET51.1.80.170647                                                                                     |
| 11                                   | IESPGM.PTET51.1.556.208877                                                                                    |
| 12                                   | IESPGM.PTET51.1.17.435655                                                                                     |

|    |                            |
|----|----------------------------|
| 13 | IESPGM.PTET51.1.21.531260  |
| 14 | IESPGM.PTET51.1.65.88217   |
| 15 | IESPGM.PTET51.1.39.111460  |
| 16 | IESPGM.PTET51.1.89.477     |
| 17 | IESPGM.PTET51.1.36.479871  |
| 18 | IESPGM.PTET51.1.13.587192  |
| 19 | IESPGM.PTET51.1.105.153096 |
| 20 | IESPGM.PTET51.1.123.206988 |
| 21 | IESPGM.PTET51.1.127.241939 |
| 22 | IESPGM.PTET51.1.2.852221   |
| 23 | IESPGM.PTET51.1.40.421487  |
| 24 | IESPGM.PTET51.1.312.2346   |
| 25 | IESPGM.PTET51.1.12.28085   |
| 26 | IESPGM.PTET51.1.556.85893  |
| 27 | IESPGM.PTET51.1.44.389851  |
